# Supplementary material for: Association Between Daily Alcohol Intake and Risk of All-Cause Mortality: A Systematic Review and Meta-analyses
Source: PubMed Central journal article supplement (PMC10066463; doi:10.1001/jamanetworkopen.2023.6185), 2023-03-31
Supplement: jamanetwopen-e236185-s002.pdf [file jamanetwopen-e236185-s002.pdf]

## Data Sharing Statement

Zhao. Association Between Daily Alcohol Intake and Risk of All-Cause Mortality. *JAMA Netw Open*. Published March 31, 2023. doi:10.1001/jamanetworkopen.2023.6185

### Data

**Data available:** No
